# Supplementary material for: Corticosteroid-dependent immune checkpoint inhibitor-induced enterocolitis treated with vedolizumab: a case report
Source: PubMed Central journal article supplement — J Gastrointest Oncol. 2024 Jul 11;15(4):1948–56. doi: 10.21037/jgo-24-222 (PMC11399875; doi:10.21037/jgo-24-222), 2024-07-11
Supplement: jgo-15-04-1948-rc.pdf [file jgo-15-04-1948-rc.pdf]

| Topic                            | Item No | Checklist item description                                                                                                                                                     | Reported on Page Number/Line Number | Reported on Section/Paragraph |
|----------------------------------|---------|--------------------------------------------------------------------------------------------------------------------------------------------------------------------------------|-------------------------------------|-------------------------------|
| Title                            | 1       | The diagnosis or intervention of primary focus followed by the words “case report”                                                                                             | P1                                  | Cover page, para 1            |
| Key Words                        | 2       | 2 to 5 key words that identify diagnoses or interventions in this case report, including "case report"                                                                         | P1 line 30-31                       | Abstract, para 4              |
| Abstract<br>(Structured summary) | 3a      | Background: state what is known and unknown; why the case report is unique and what it adds to existing literature.                                                            | P1 line 17-22                       | Abstract, para 1              |
|                                  | 3b      | Case Description: describe the patient’s demographic details, main symptoms, history, important clinical findings, the main diagnosis, interventions, outcomes and follow-ups. | P1 line 23-27                       | Abstract, para 2              |
|                                  | 3c      | Conclusions: summarize the main take-away lesson, clinical impact and potential implications.                                                                                  | P1 line 28-29                       | Abstract, para 3              |
| Introduction                     | 4       | One or two paragraphs summarizing why this case is unique ( <b>may include references</b> )                                                                                    | P2 line 34-63                       | Introduction, para 1,2        |
| Patient Information              | 5a      | De-identified patient specific information                                                                                                                                     | P2 line 66                          | Case presentation, para 1     |
|                                  | 5b      | Primary concerns and symptoms of the patient                                                                                                                                   | P2 line 67                          | Case presentation, para 1     |
|                                  | 5c      | Medical, family, and psycho-social history including relevant genetic information                                                                                              | P2 line 68                          | Case presentation, para 1     |
|                                  | 5d      | Relevant past interventions with outcomes                                                                                                                                      | P2 line 68                          | Case presentation, para 1     |
| Clinical Findings                | 6       | Describe significant physical examination (PE) and important clinical findings                                                                                                 | P2 line 69                          | Case presentation, para 1     |
| Timeline                         | 7       | Historical and current information from this episode of care organized as a timeline                                                                                           | P3 line 108                         | Case presentation, para 5     |
| Diagnostic Assessment            | 8a      | Diagnostic testing (such as PE, laboratory testing, imaging, surveys).                                                                                                         | P2 line 70-73, P3 line 86-88        | Case presentation, para 2, 4  |
|                                  | 8b      | Diagnostic challenges (such as access to testing, financial, or cultural)                                                                                                      | None                                | None                          |
|                                  | 8c      | Diagnosis (including other diagnoses considered)                                                                                                                               | P2 line 74                          | Case presentation, para 2     |
|                                  | 8d      | Prognosis (such as staging in oncology) where applicable                                                                                                                       | P2 line 74                          | Case presentation, para 2     |
| Therapeutic Intervention         | 9a      | Types of therapeutic intervention (such as pharmacologic, surgical, preventive, self-care)                                                                                     | P2-3 line 75-83, P3 line 89-113     | Case presentation, para 2-5   |
|                                  | 9b      | Administration of therapeutic intervention (such as dosage, strength, duration)                                                                                                | P3 line 89-102                      | Case presentation, para 4-5   |
|                                  | 9c      | Changes in therapeutic intervention (with rationale)                                                                                                                           | P3 line 104-107                     | Case presentation, para 5     |

|                        |     |                                                                                                        |                                         |                                          |
|------------------------|-----|--------------------------------------------------------------------------------------------------------|-----------------------------------------|------------------------------------------|
| Follow-up and Outcomes | 10a | Clinician and patient-assessed outcomes (if available)                                                 | P3 line 111-113                         | Case presentation, para 6                |
|                        | 10b | Important follow-up diagnostic and other test results                                                  | P3 line 115-117                         | Case presentation, para 6                |
|                        | 10c | Intervention adherence and tolerability (How was this assessed?)                                       | P3 line 110-111                         | Case presentation, para 6                |
|                        | 10d | Adverse and unanticipated events                                                                       | None                                    | None                                     |
| Discussion             | 11a | A scientific discussion of the strengths AND limitations associated with this case report              | P5 line 185-194, P5 line 177-183        | Conclusion, para 1.<br>Discussion, para4 |
|                        | 11b | Discussion of the relevant medical literature <b>with references</b>                                   | P4-5 line 123-176                       | Discussion, para2-3                      |
|                        | 11c | The scientific rationale for any conclusions (including assessment of possible causes)                 | None                                    | None                                     |
|                        | 11d | The primary “take-away” lessons of this case report (without references) in a one paragraph conclusion | P5 line 187-189                         | Conclusion, para 1.                      |
| Patient Perspective    | 12  | The patient should share their perspective in one to two paragraphs on the treatment(s) they received  | None                                    | None                                     |
| Informed Consent       | 13  | Did the patient give informed consent? Please provide if requested                                     | Yes <input checked="" type="checkbox"/> | No <input type="checkbox"/>              |

Article Information: <https://dx.doi.org/10.21037/jgo-24-222>

\*As the checklist was provided upon initial submission, the page number/line number reported may be changed due to copyediting and may not be referable in the published version. In this case, the section/paragraph may be used as an alternative reference.
